# Supplementary material
Source: PubMed Central journal article supplement (PMC3292384)
Supplement: 11-8494_z7g999112302st1.pdf [file 11-8494_z7g999112302st1.pdf]

## Supplemental Material 1

### Oligonucleotide Morpholino Sequences

| <i>Gene</i>   | <i>Sequence 5'-3'</i>     |
|---------------|---------------------------|
| <i>pitx2a</i> | TTTGCGGCAGTGGGAGTCCATTTCT |
| <i>pitx2c</i> | GATCCTTCATAGAGGTCATGGATAA |
| <i>raldh2</i> | GTTCAACTTCACTGGAGGTCATC   |
| <i>raldh3</i> | TATAGTCCCGTTCTGTGCCATAGCA |
| <i>p53</i>    | GCGCCATTGCTTTGCAAGAATTG   |
